# Supplementary material for: Enzymatic Synthesis of Novel Vitexin Glucosides
Source: MDPI journal article supplement (doi:10.3390/molecules26206274), 2021-10-16
Supplement: s1 [file s1]

## Supplemental materials:

# Enzymatic Synthesis of Novel Vitexin Glucosides

Jiumn-Yih Wu <sup>1,†</sup>, Tzi-Yuan Wang <sup>2,†</sup>, Hsiou-Yu Ding <sup>3,†</sup>, Yun-Rong Zhang <sup>4</sup>, Shu-Yuan Lin <sup>4</sup>, and Te-Sheng Chang <sup>4,\*</sup>

<sup>1</sup> Department of Food Science, National Quemoy University, Kinmen County 892, Taiwan; wujy@nqu.edu.tw

<sup>2</sup> Biodiversity Research Center, Academia Sinica, Taipei 11529, Taiwan; tziyuan@gmail.com

<sup>3</sup> Department of Cosmetic Science, Chia Nan University of Pharmacy and Science, No. 60, Erh-Jen Rd., Sec. 1, Jen-Te District, Tainan 71710, Taiwan; ding8896@gmail.com

<sup>4</sup> Department of Biological Sciences and Technology, National University of Tainan, Tainan 70005, Taiwan; S10758011@gm2.nutn.edu.tw (Y.-R.Z.); s10758010@gm2.nutn.edu.tw (S.-Y.L.)

\* Correspondence: mozyme2001@gmail.com; Tel./Fax: +88-66-260-2137

† These authors contributed equally to this manuscript

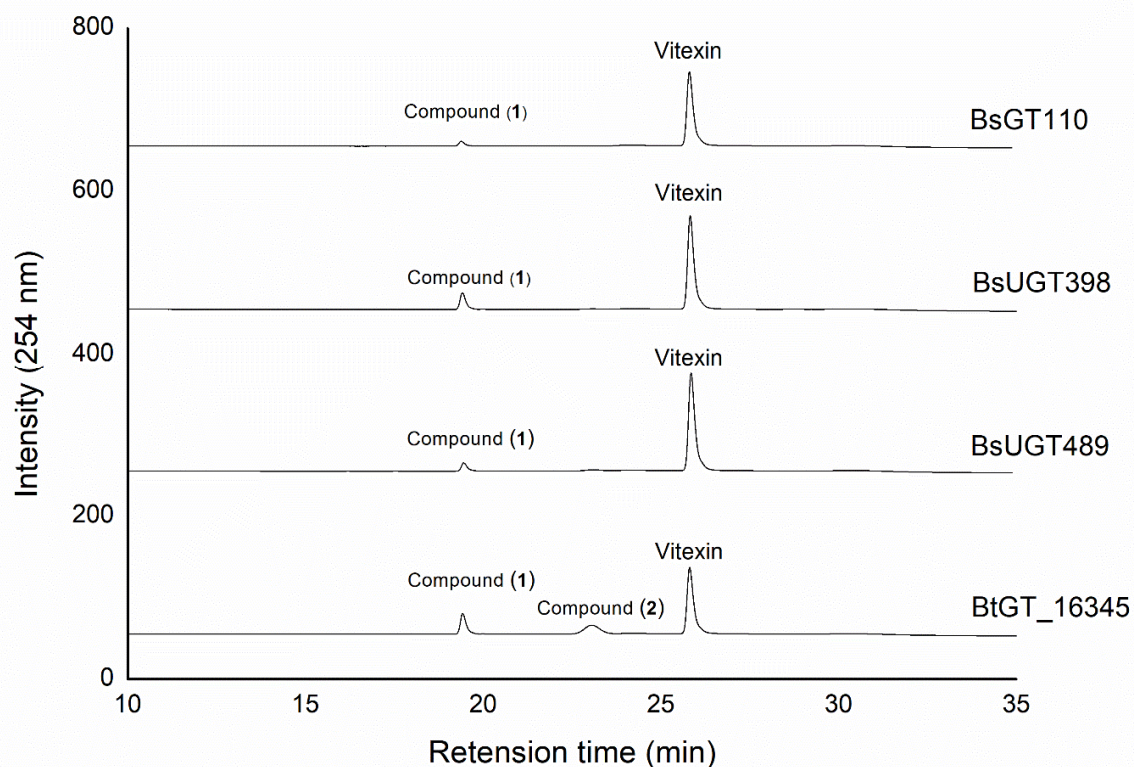

**Figure S1.** High-performance liquid chromatography (HPLC) analysis of the biotransformation products of vitexin using *Bacillus* GT enzymes. The biotransformation mixture containing 25  $\mu\text{g/mL}$  purified recombinant GT enzymes, 1  $\text{mg/mL}$  vitexin, 10  $\text{mM}$  uridine diphosphate-glucose (UDP-G), 10  $\text{mM}$   $\text{MgCl}_2$ , and 50  $\text{mM}$  phosphate buffer (PB) at pH 6 (BsGT110), pH 7 (BtGT\_16345), or Tris buffer at pH 8 (BsUGT398 and BsUGT489) was incubated at 30  $^{\circ}\text{C}$  (BsGT110 and BtGT\_16345) or 40  $^{\circ}\text{C}$  (BsUGT398 and BsUGT489) for 30 min. After incubation, the biotransformation products of vitexin by BsUGT398 (a), BsUGT489 (b), BsGT110 (c), and BtGT\_16345 (d) were analyzed using HPLC. The HPLC procedure is described in the Materials and methods section.

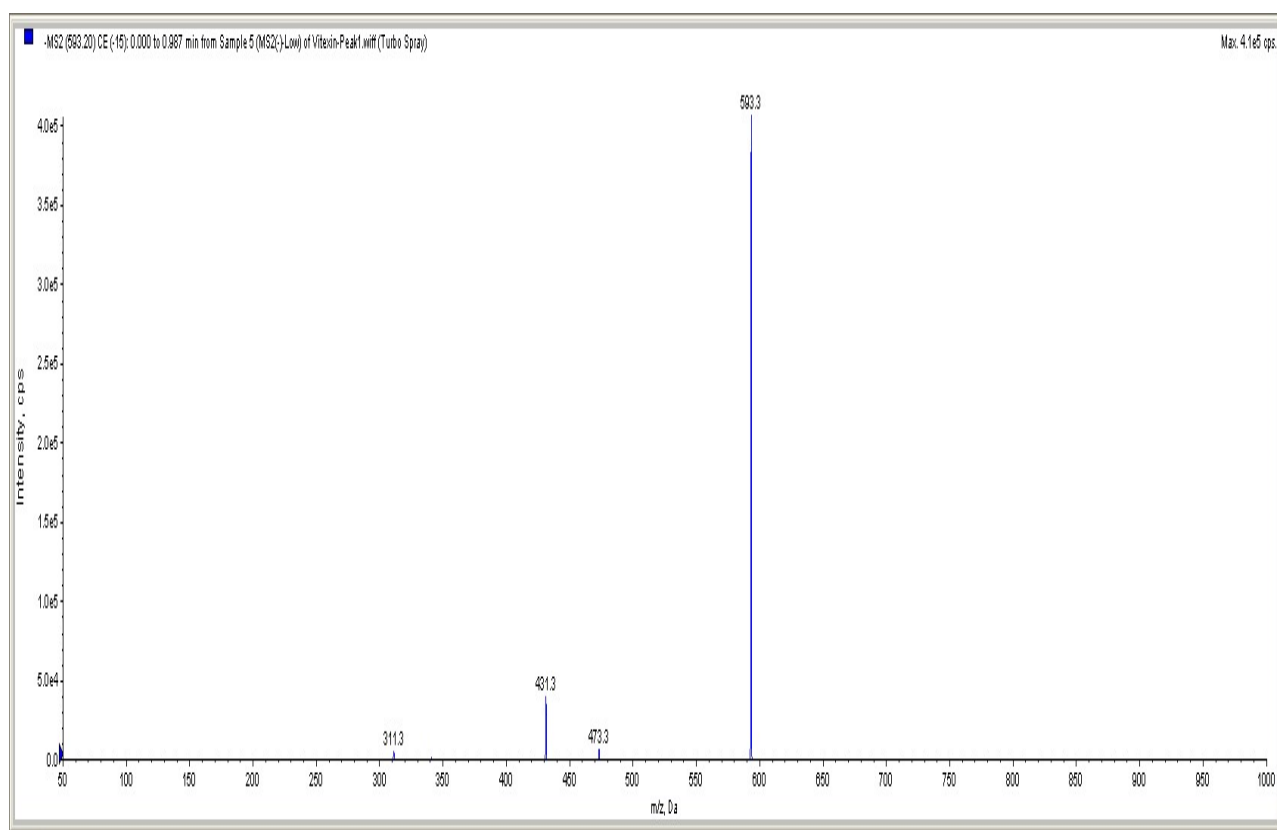

**Figure S2.** Mass-mass analysis of vitexin-4'-*O*- $\beta$ -glucoside (**1**) at the negative mode. A significant signal at m/z 593.3 showed the corresponding m/z signal of molecular weight 432 of vitexin-4'-*O*- $\beta$ -glucoside (**1**) ( $432+180-18$ ) at the negative mode vitexin -G – H]<sup>-</sup>.

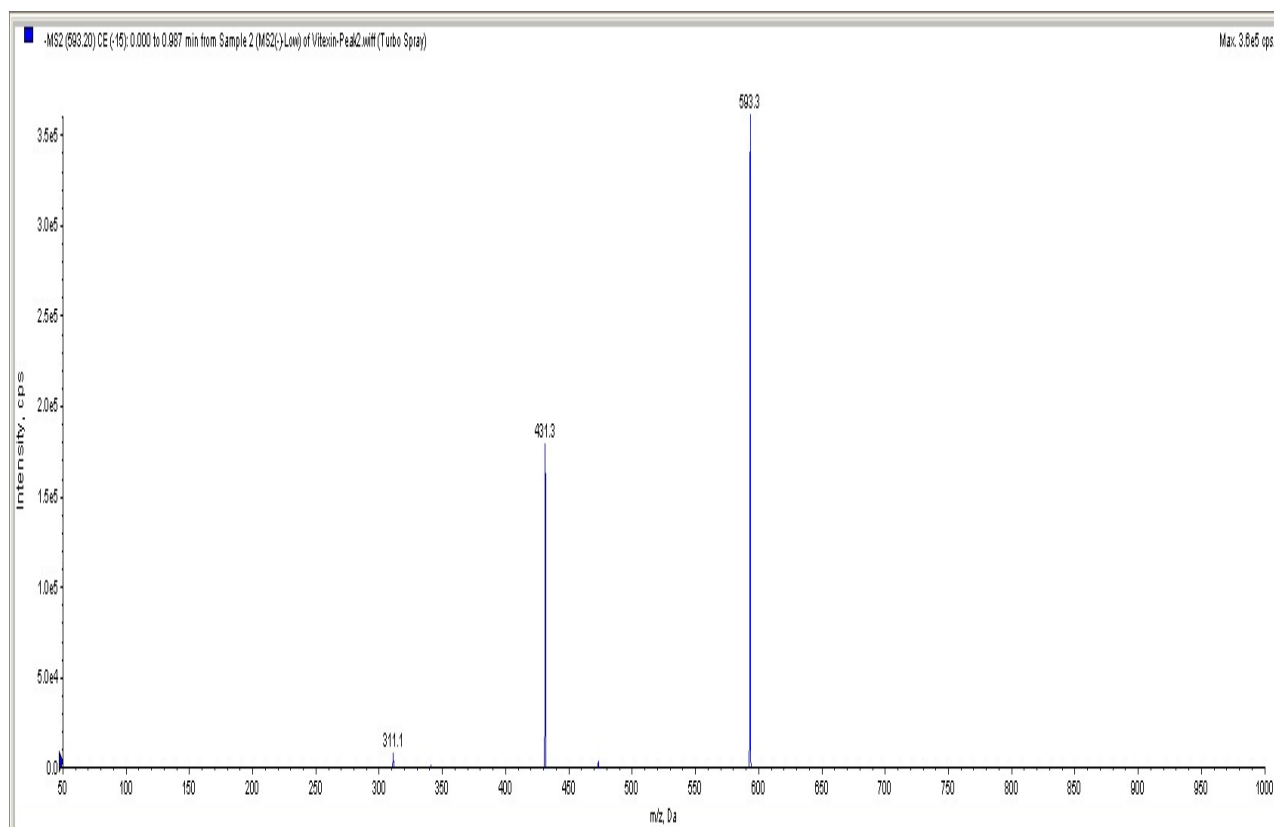

**Figure S3.** Mass-mass analysis of vitexin-5-*O*- $\beta$ -glucoside (**2**) at the negative mode. A significant signal at  $m/z$  593.3 showed the corresponding  $m/z$  signal of molecular weight 432 of vitexin-5-*O*- $\beta$ -glucoside (**2**) ( $432+180-18$ ) at the negative mode [ $\text{vitexin-G-H}]^-$ .

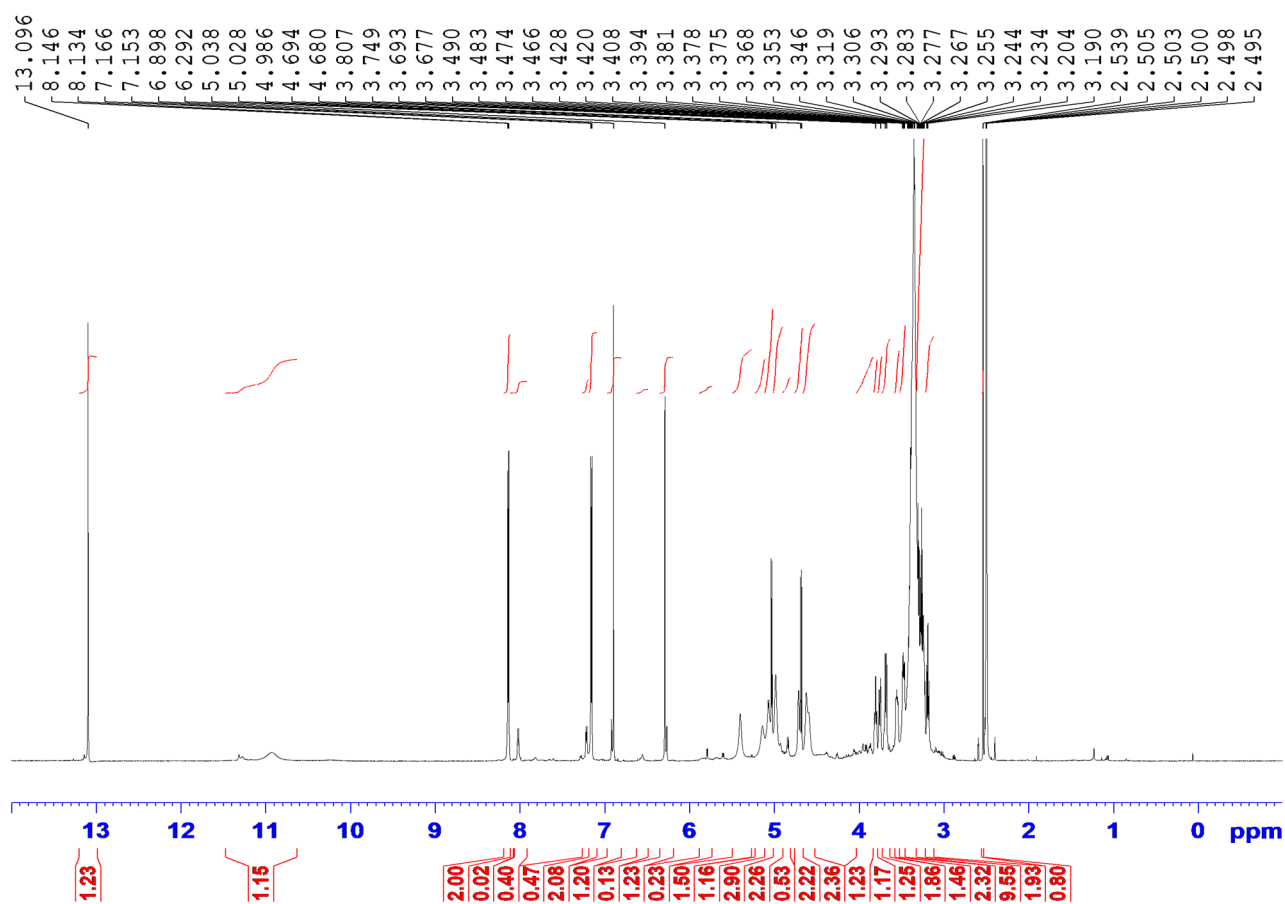

**Figure S4.** The  $^1\text{H}$ -NMR (700MHz, DMSO- $d_6$ ) spectrum of vitexin-4'-O- $\beta$ -glucoside (1).

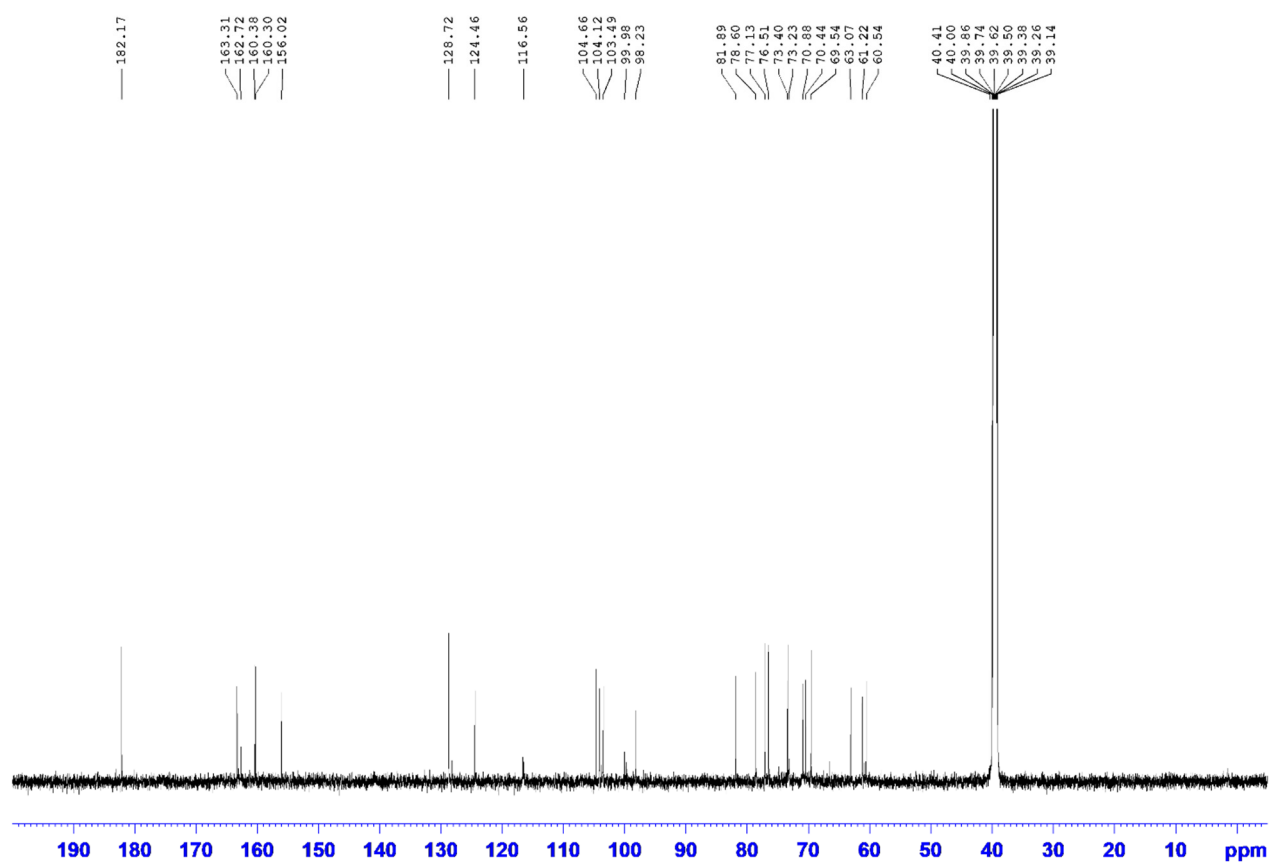

**Figure S5.** The  $^{13}\text{C}$ -NMR (175MHz,  $\text{DMSO-}d_6$ ) spectrum of vitexin-4'-O- $\beta$ -glucoside (**1**).

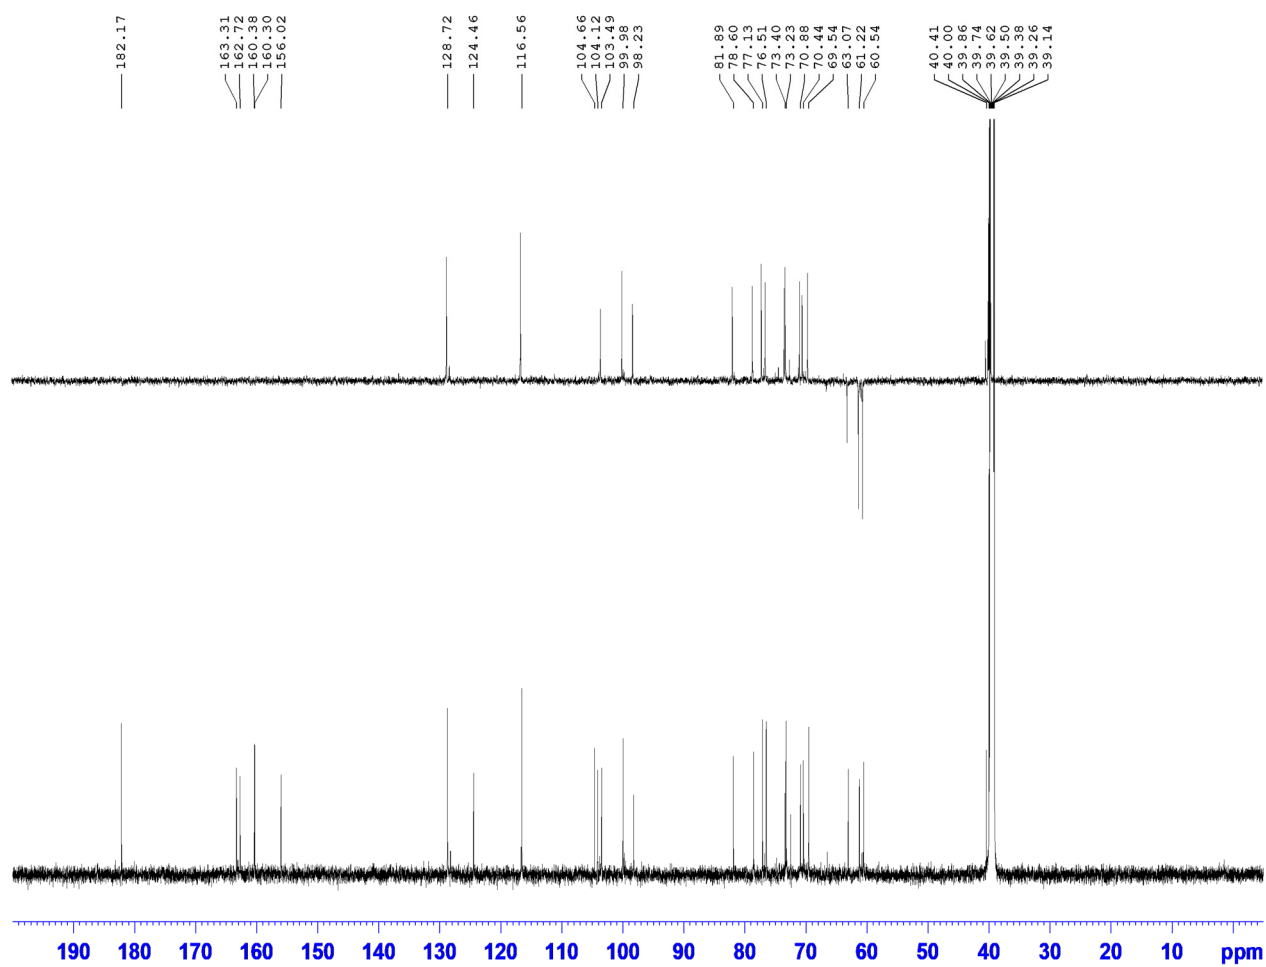

**Figure S6.** The DEPT-135 (175MHz, DMSO- $d_6$ ) spectrum of vitexin-4'-O- $\beta$ -glucoside (**1**).

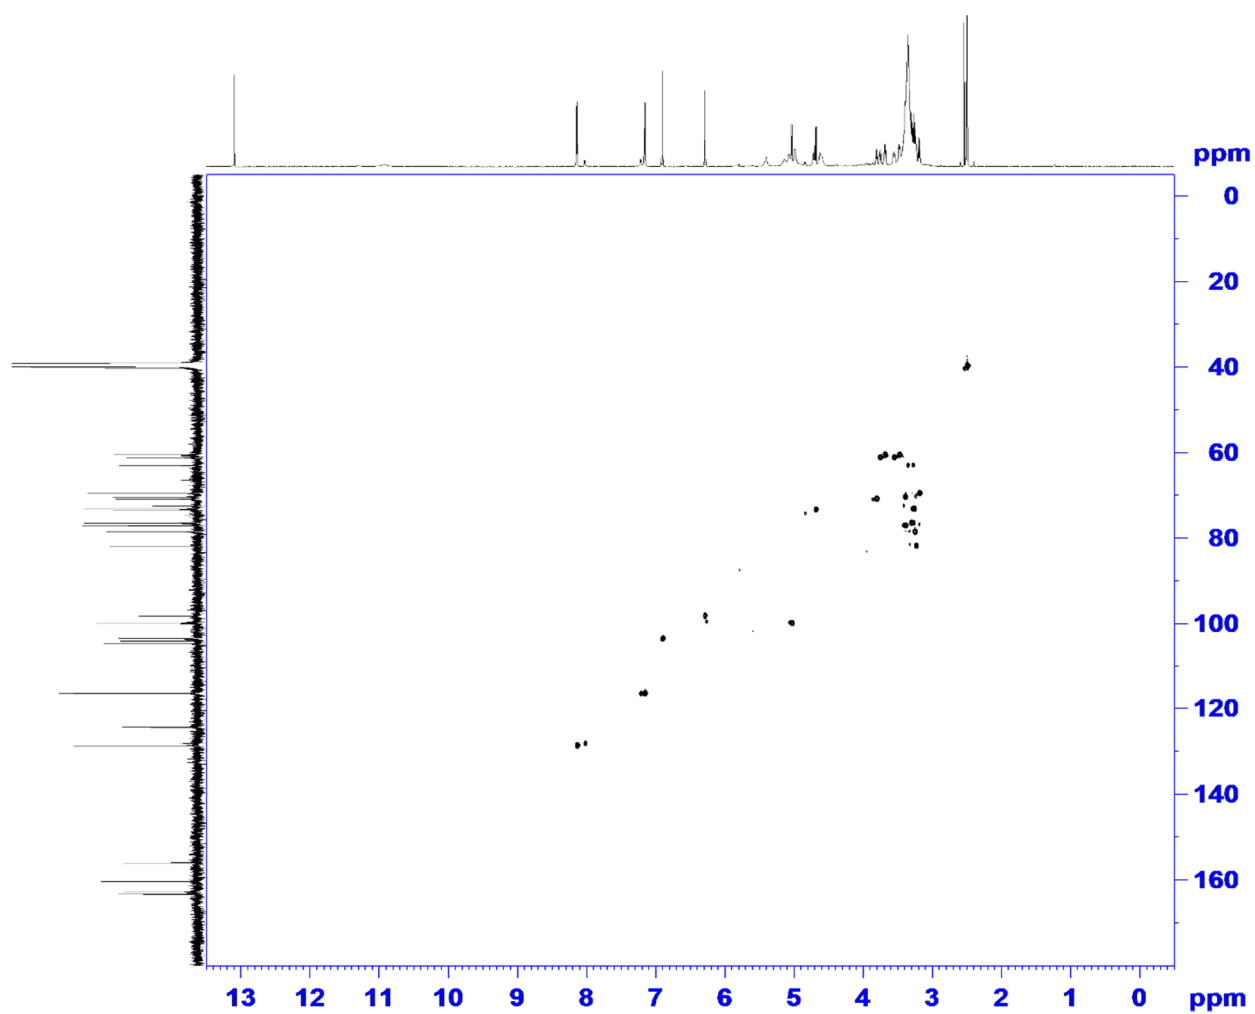

**Figure S7.** The HSQC (700MHz, DMSO- $d_6$ ) spectrum of vitexin-4'-O- $\beta$ -glucoside (**1**).



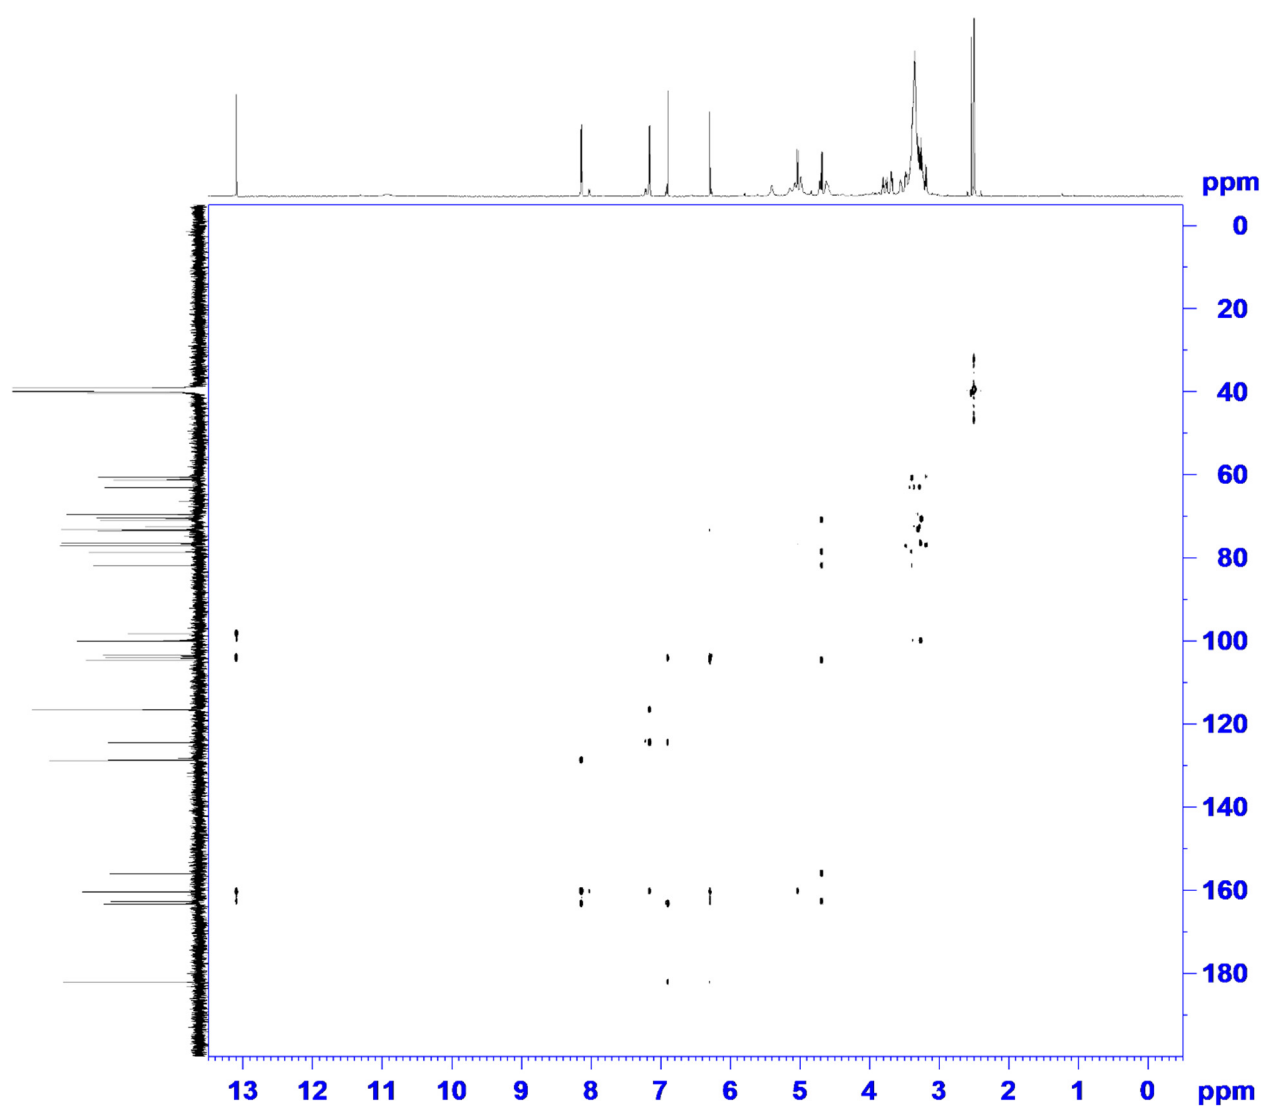

**Figure S8.** The HMBC (700MHz, DMSO-*d*<sub>6</sub>) spectrum of vitexin-4'-O- $\beta$ -glucoside (**1**).

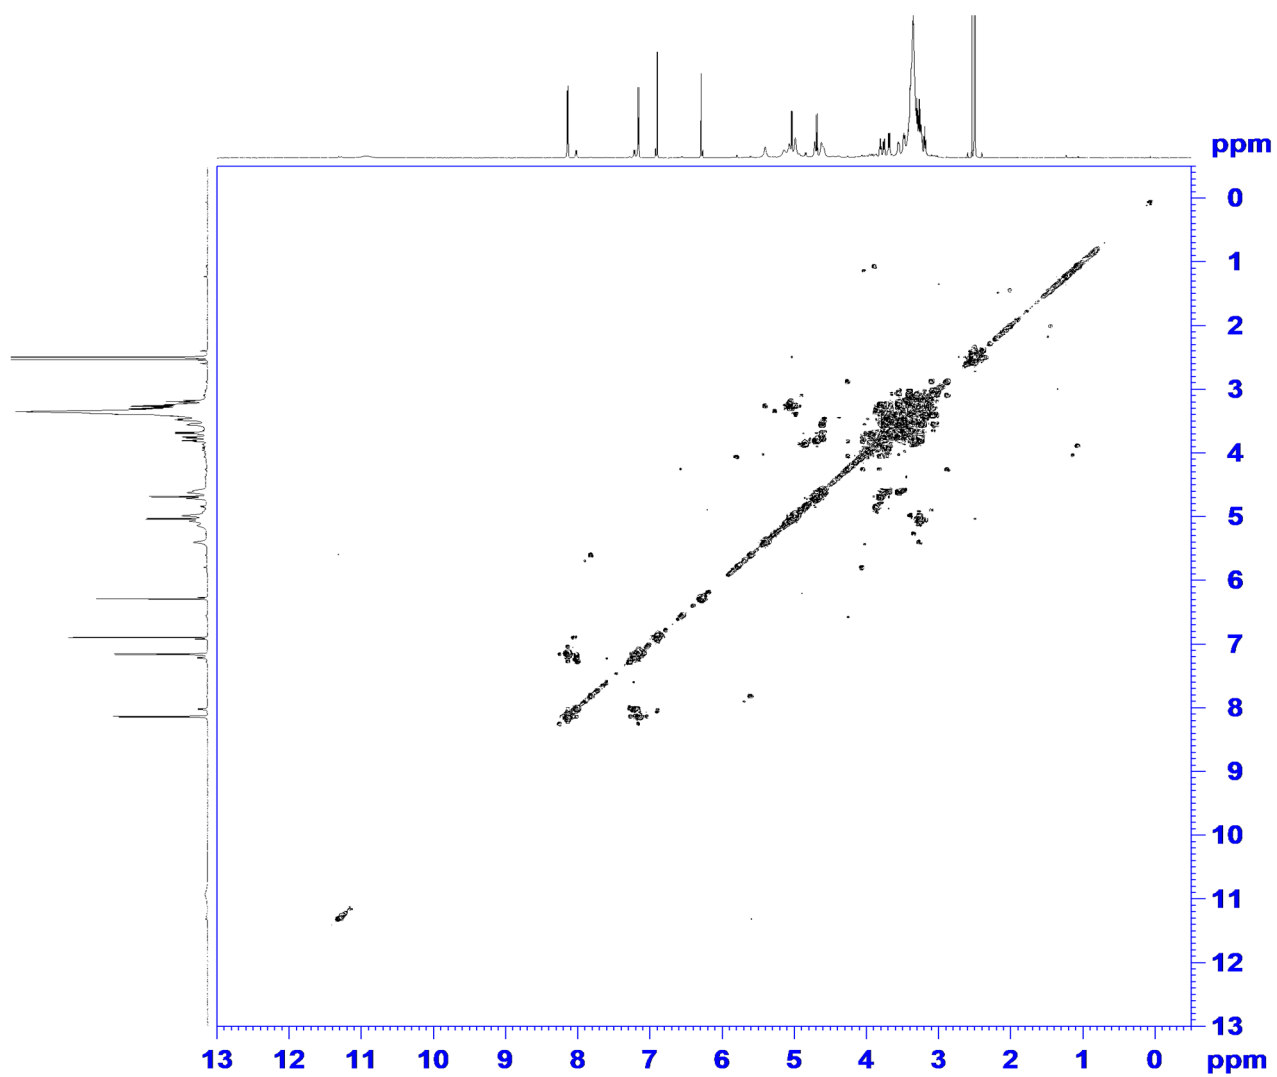

**Figure S9.** The COSY (700MHz, DMSO-*d*<sub>6</sub>) spectrum of vitexin-4'-O- $\beta$ -glucoside (**1**).

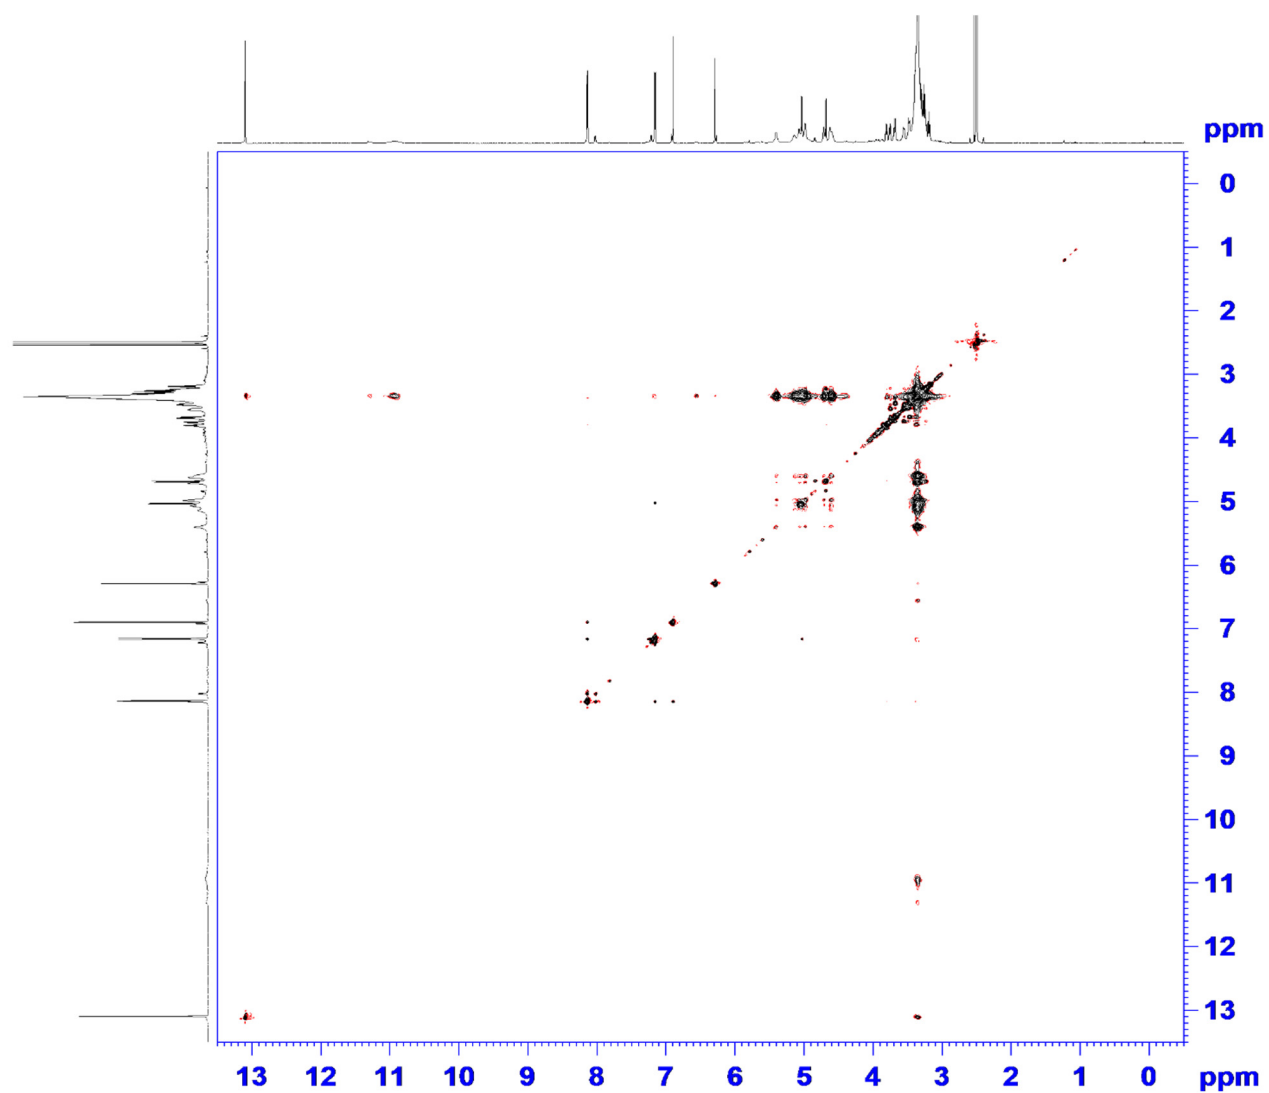

**Figure S10.** The NOESY (700MHz, DMSO- $d_6$ ) spectrum of vitexin-4'-O- $\beta$ -glucoside (**1**).

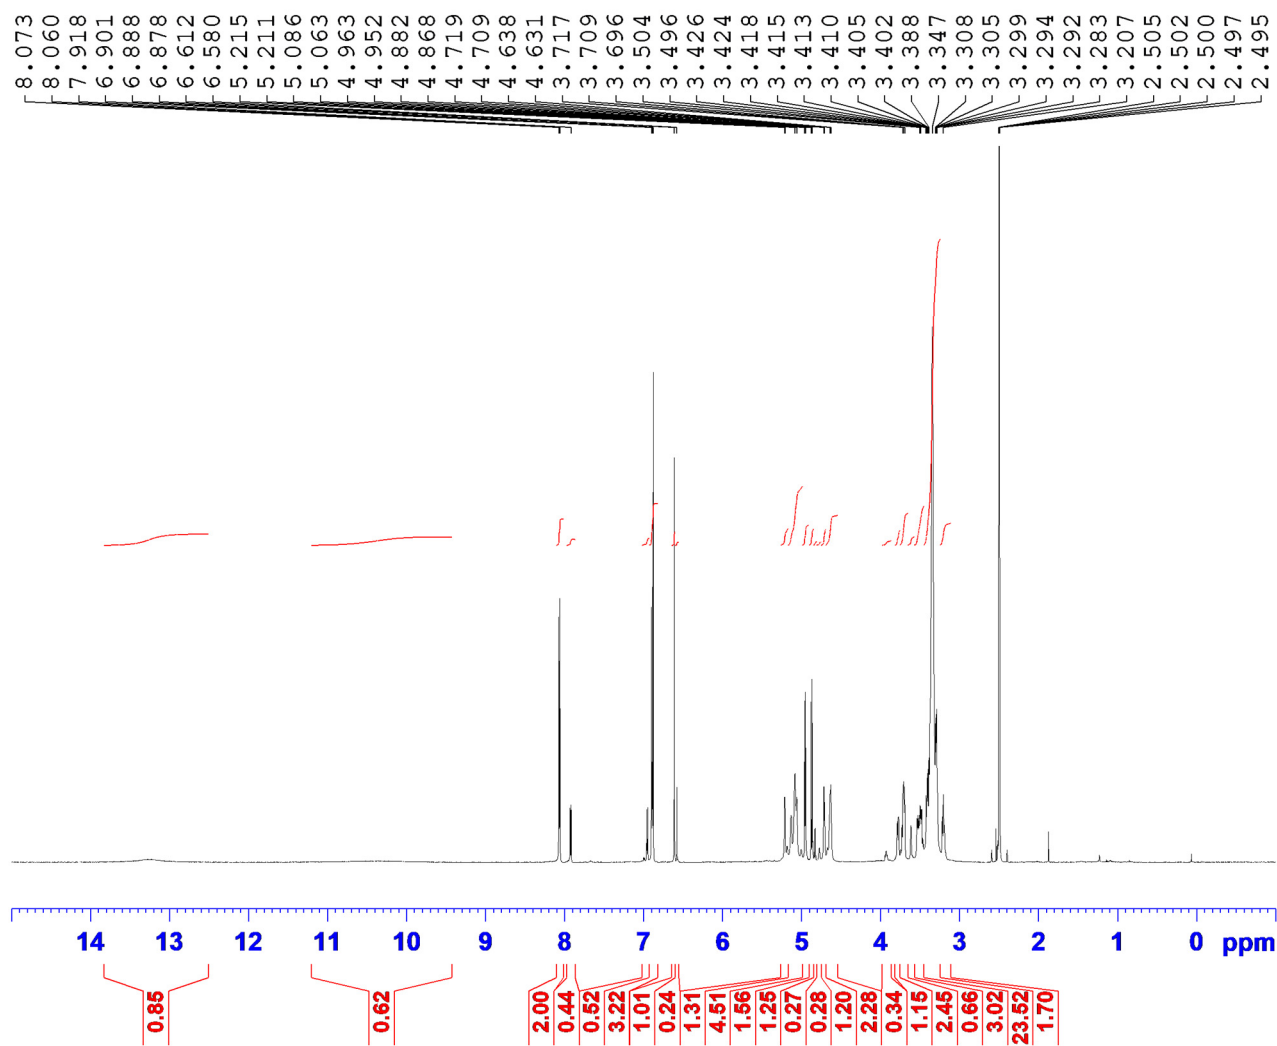

**Figure S11.** The  $^1\text{H}$ -NMR (700MHz,  $\text{DMSO}-d_6$ ) spectrum of vitexin-5-O- $\beta$ -glucoside (2).

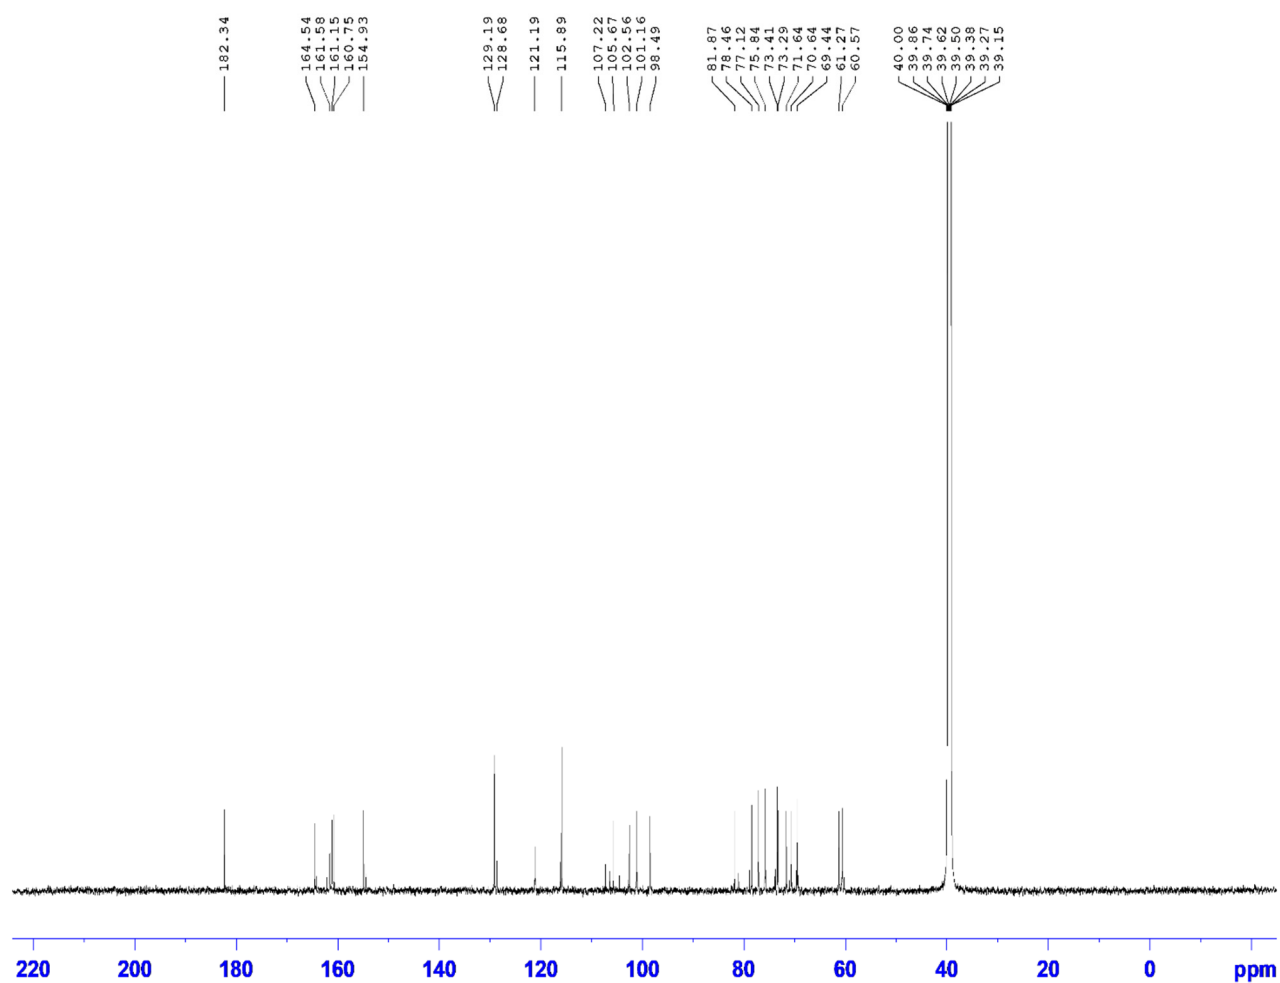

**Figure S12.** The  $^{13}\text{C}$ -NMR (175MHz,  $\text{DMSO}-d_6$ ) spectrum of vitexin-5-O- $\beta$ -glucoside (**2**).

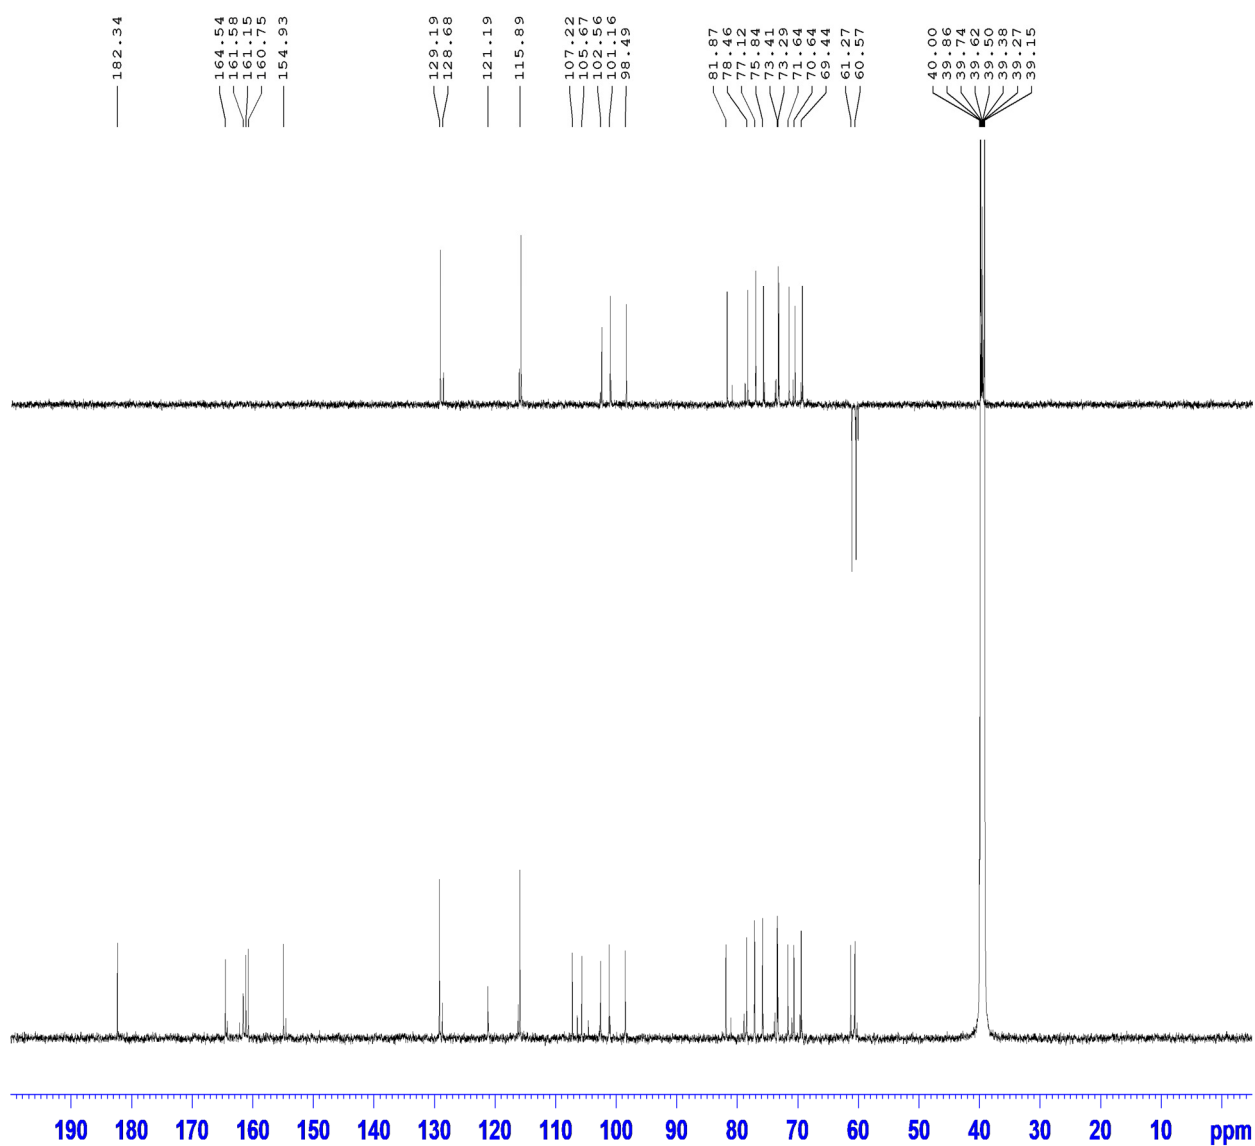

**Figure S13.** The DEPT-135 (175MHz, DMSO- $d_6$ ) spectrum of vitexin-5-O- $\beta$ -glucoside (2).

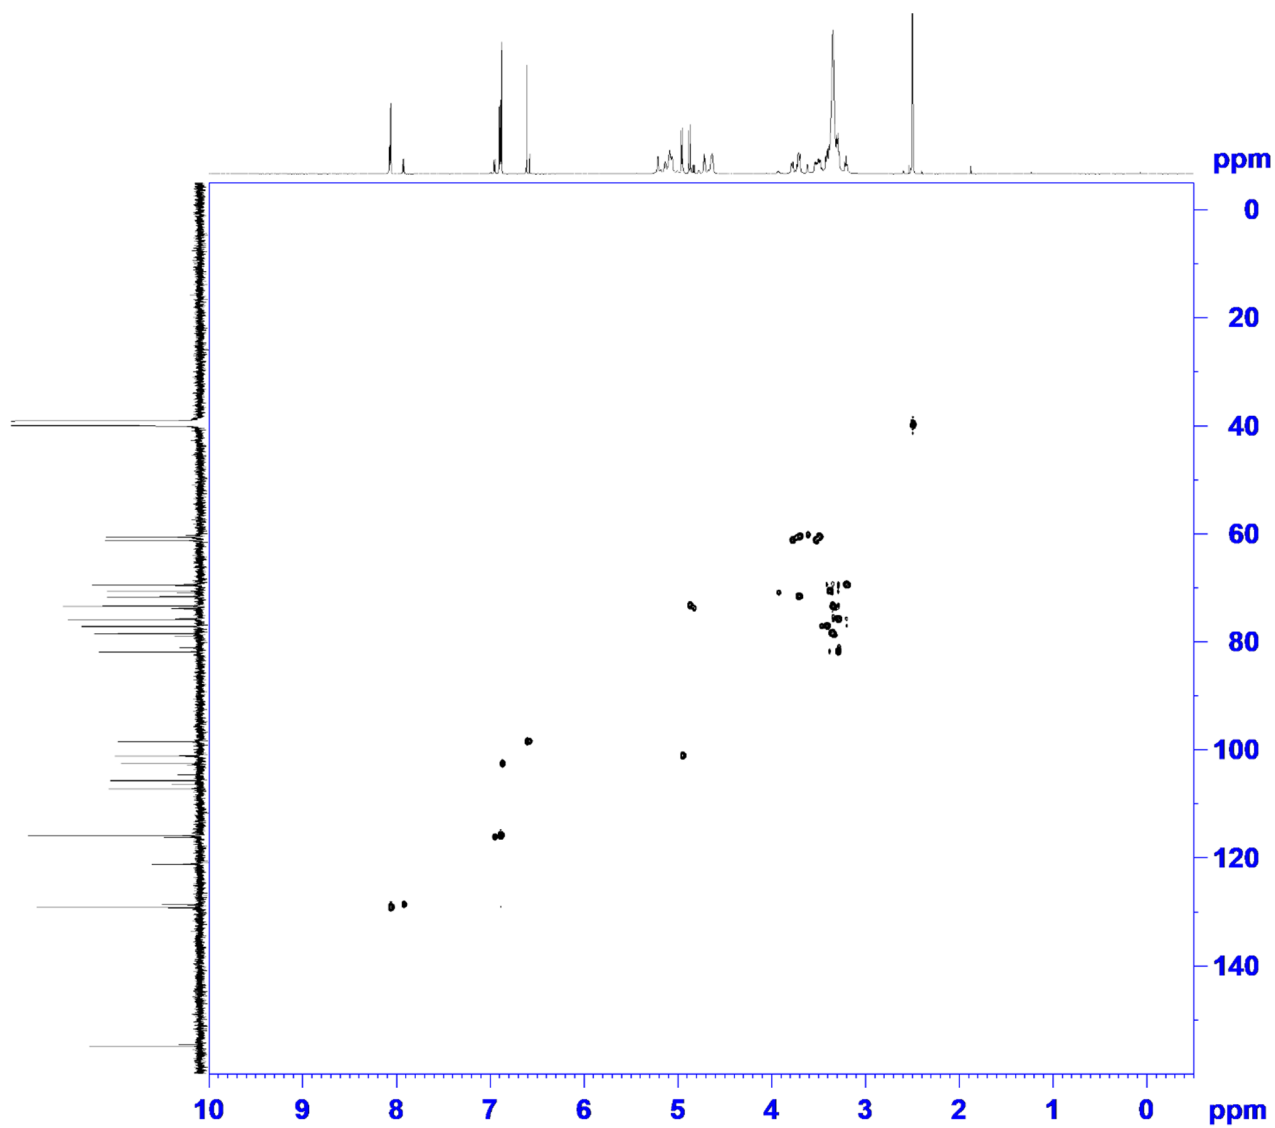

**Figure S14.** The HSQC (700MHz, DMSO-*d*<sub>6</sub>) spectrum of vitexin-5-O- $\beta$ -glucoside (**2**).

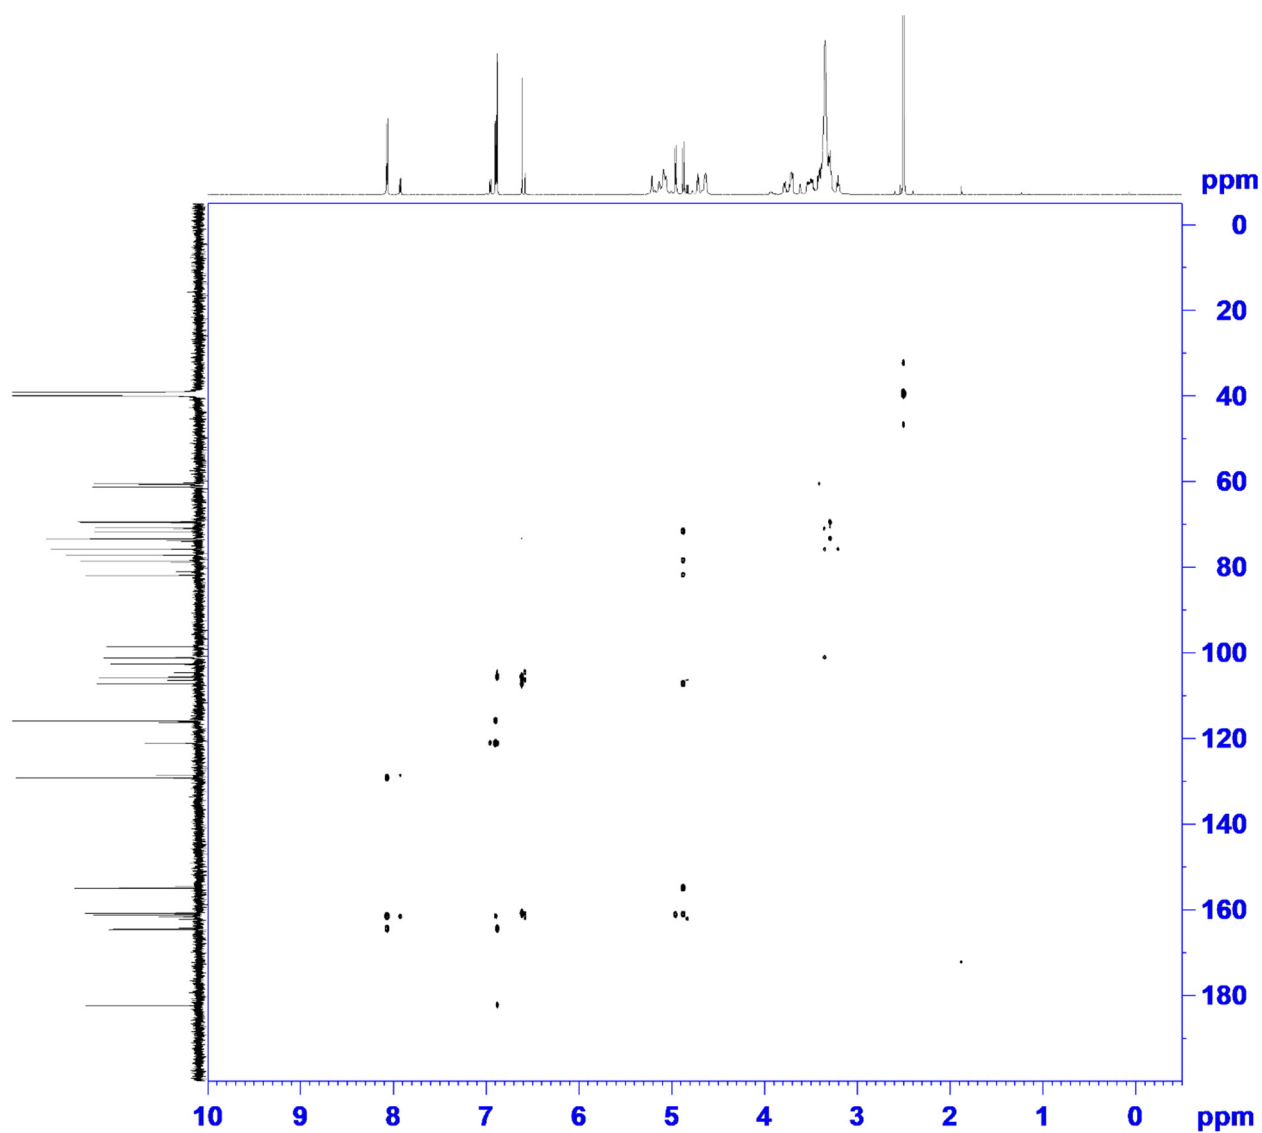

**Figure S15.** The HMBC (700MHz, DMSO-*d*<sub>6</sub>) spectrum of vitexin-5-O- $\beta$ -glucoside (**2**).



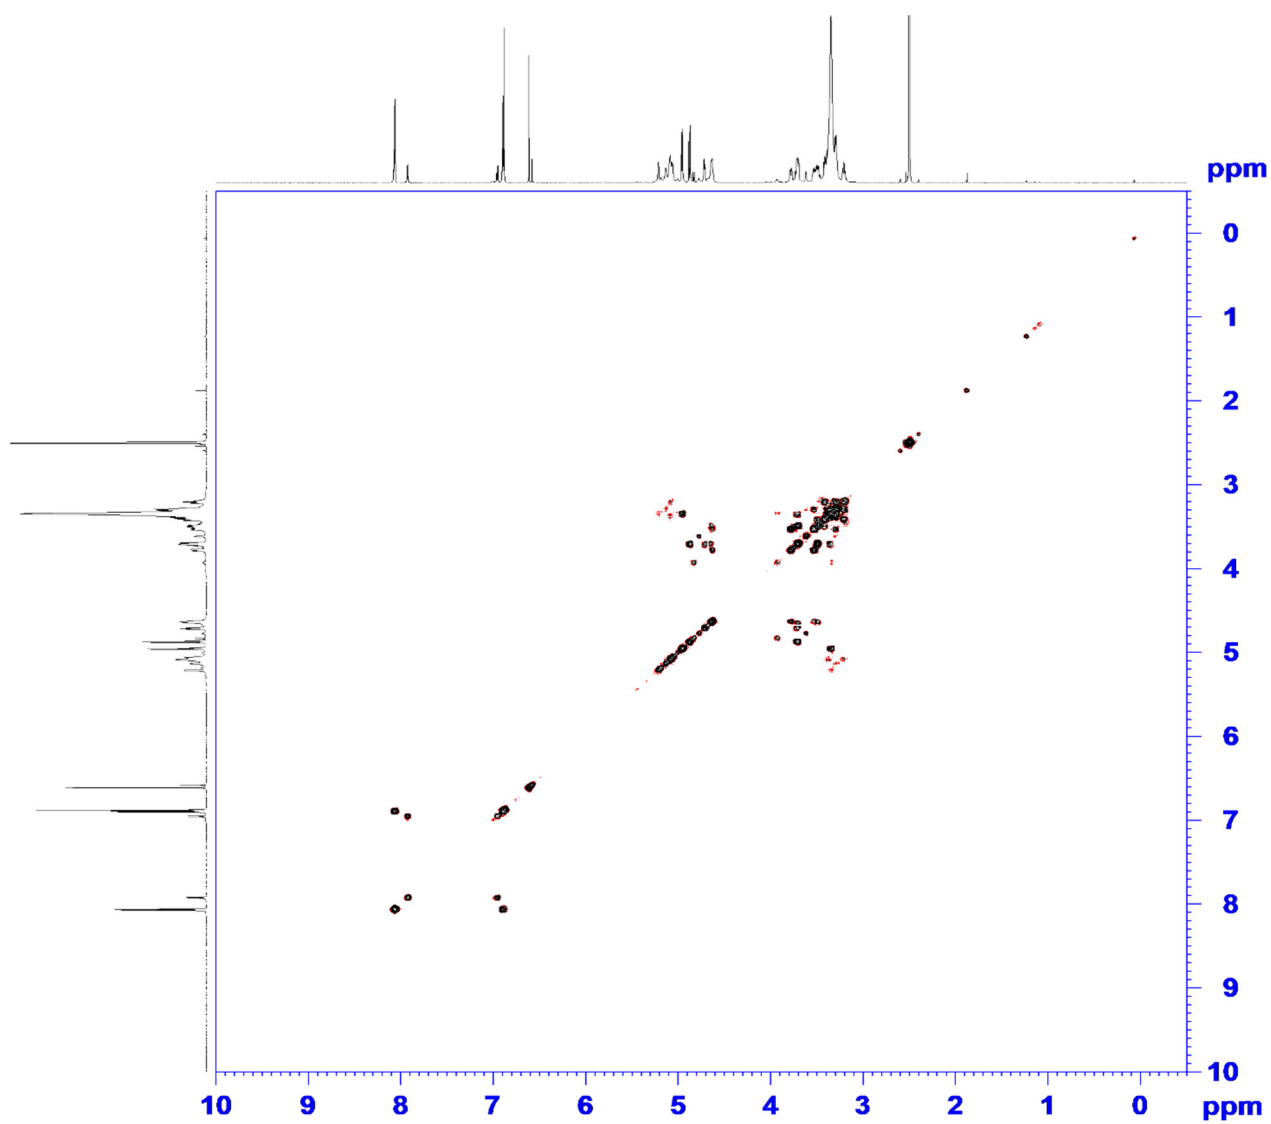

**Figure S16.** The COSY (700MHz, DMSO- $d_6$ ) spectrum of vitexin-5-O- $\beta$ -glucoside (2).

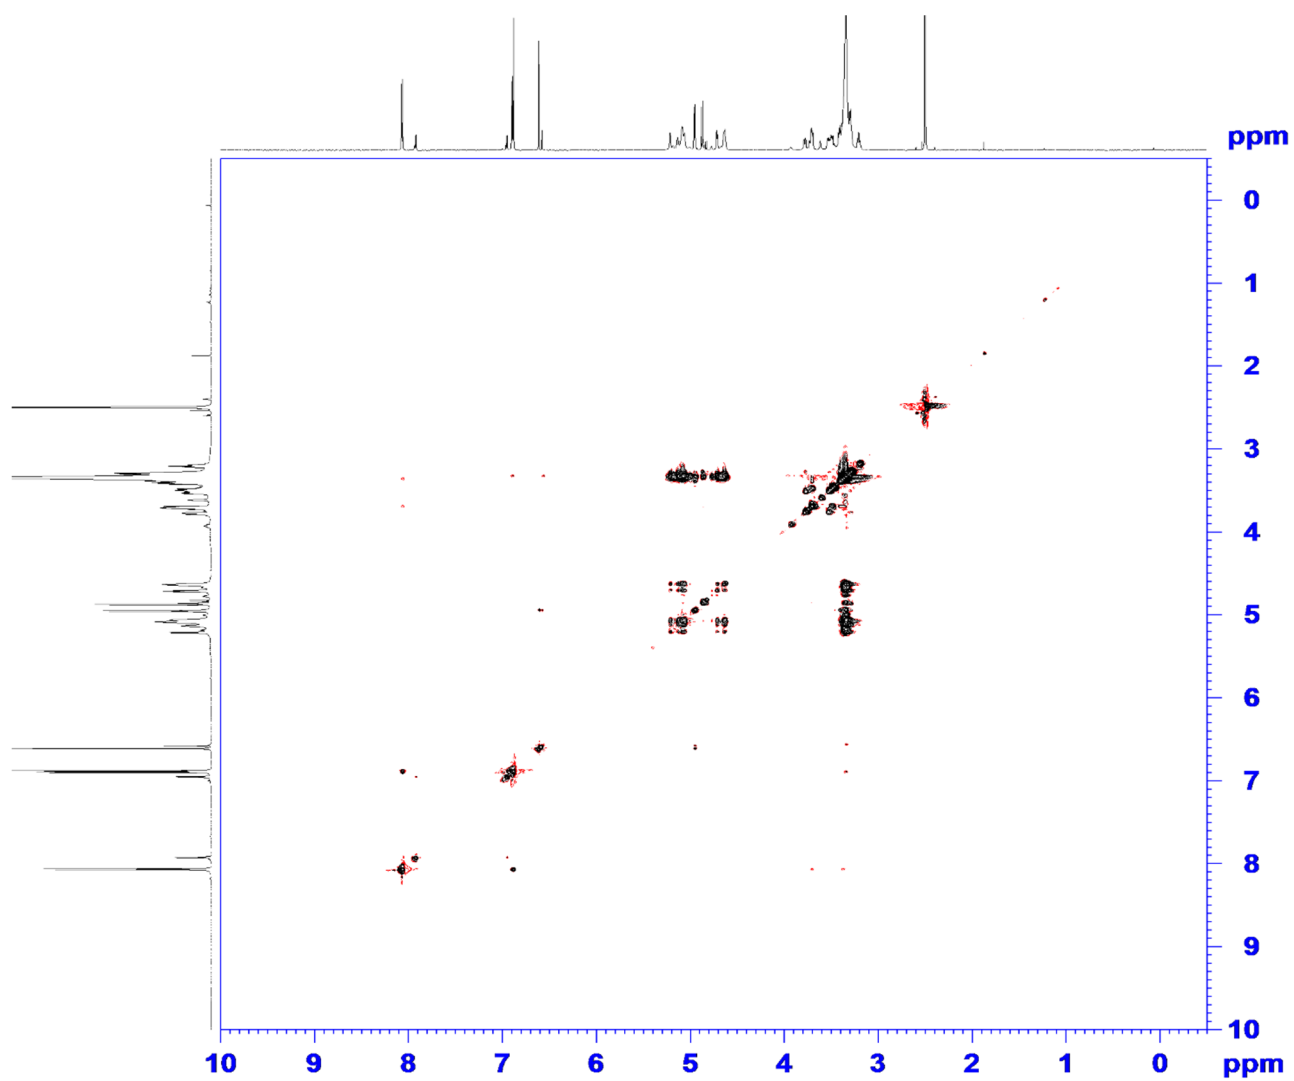

**Figure S17.** The NOESY (700MHz, DMSO- $d_6$ ) spectrum of vitexin-5-O- $\beta$ -glucoside (2).
